# Supplementary material for: Detection of NRG1 Gene Fusions in Solid Tumors
Source: Oxford University Press journal article supplement (doi:10.1158/1078-0432.ccr-19-0160), 2019-04-15
Supplement: 10780432ccr190160-sup-215427_2_table_5429548_pp3jc4.docx [file 10780432ccr190160-sup-215427_2_table_5429548_pp3jc4.docx]

| **Table S1. Description of NRG1 Fusions Identified** | | | |
| --- | --- | --- | --- |
| **Frame Prediction** | ***NRG1* Breakpoints** | **Fusion Partner Breakpoints** | **Tumor, n** |
| In-Frame | **NRG1**(+)NM_001159995.2|  **Exon:5**|chr8:32585467,chr8:32585494 | **CD74**(-)NM_004355.3| **Exon:6**|chr5:149784243,chr5:149784330 | NSCLC, n=7 |
| **CD74**(-)NM_004355.3| **Exon:7**|chr5:149782126,chr5:149782174 | NSCLC, n=4 |
| **CD74**(-)NM_001025158.2|  **Exon:7**| chr5:149782126,chr5:149782188 | NSCLC, n=1 |
| **SLC3A2**(+)NR_037193.1| **Exon:1**|chr11:62649440,chr11:62649538 | NSCLC, n=1 |
| **SDC4**(-)NM_002999.3|  **Exon:2**|chr20:43964422,chr20:43964556 | NSCLC, n=3 |
| **TNC**(-)NM_002160.3| **Exon:10**|chr9:117835882,chr9:117836145 | NSCLC, n=1 |
| **TSHZ2**(+)NM_173485.5| **Exon:1**|chr20:51589826,chr20:51589872 | Ovarian, n=1 |
| **NOTCH2**(-)NM_024408.3| **Exon:4**|chr1:120539620,chr1:120539870 | GBC, n=1 |
| **RBPMS**(-)NM_006867.3|  **Exon:5**|chr8:30361803,chr8:30361953 | NSCLC, n=1 |
| **MDK** (-)NM_002391.4|  **Exon:4|** chr11:46404256,chr11:46404298 | NSCLC, n=1 |
| VUS | **HMBOX1**(+)NM_001135726.1| **Exon:1**|chr8:28748072,chr8:28748195 | NET, n=1 |
| In-Frame | **NRG1**(+)NM_001159995.2|  **Exon:2**|chr8:32453346,chr8:32453372| chr8:32453346,chr8:32453371| chr8:32453346,chr8:32453523 | **ATP1B1**(+)NM_001677.3| **Exon:2**|chr1:169080670,chr1:169080736 | NSCLC, n=1  GBC, n=1 |
| **MRPL13**(-)NM_014078.5| **Exon:2**|chr8:121455425,chr8:121455531 | NSCLC, n=1 |
| **CDH1**(+)NM_004360.3| **Exon:2**|chr16:68772200,chr16:68772314 | Pancreatic, n=1 |
| **DIP2B** (+)NM_173602.2  **Exon:1**|chr12:50898965,chr12:50899023 | NSCLC, n=1 |
| **SETD4**(-)NM_017438.3| **Exon:2**|chr21:37431114,chr21:37431212 | Ovarian, n=1 |
| **ADAM9**(+)NM_003816.2|  **Exon:18**|chr8:38940487,chr8:38940592 | Breast, n=1 |
| **RBPMS**(+)NM_006867.3|  **Exon:5**|chr8:30361847,chr8:30361953 | RCC, n=1 |
| **GDF15** (+)NM_004864.2  **Exon 1|** chr19:18497219,chr19:18497276 | Bladder, n=1 |
| **PARP8(**+)XM_005248598.1| **Exon:**1|chr5:49963905:chr5:49963959 | NSCLC, n=1 |
| **ZMYM2**(+)NM_003453.3| **Exon:2**|chr13:20534098,chr13:20534166 | *Ovarian, n=1 |
| **COX10-AS1**(-)NR_049718.1| **Exon:1**|chr17:13972589,chr17:13972726 | *Breast, n=1 |
| **POMK**(+)NM_032237.4| **Exon:2**|chr8:42952667,chr8:42952758 | *CRC, n=1 |
| **WHSC1L1**(-)NM_017778.2| **Exon:1**|chr8:38239317:chr8:38239354 | *Sarcoma, n=1 |
| In-Frame | **NRG1**(+)NM_001159995.2| **Exon:1**|chr8:31496931,chr8:31496947 | **ATP1B1**(+)NM_001677.3|  **Exon:2**|chr1:169080608,chr1:169080719 | Pancreatic, n=1  GBC, n=1 |
| **NRG1**(+)NM_001159995.2| **Exon:4**|chr8:32472032,chr8:32472082 | **VTCN1**(-)NM_001253849.1| **Exon:2**|chr1:117712729:chr1:117712793 | Pancreatic, n=1 |
| VUS | **NRG1**(+)NM_001159995.2|  **Exon:2**|chr8:32453346,chr8:32453372 | **ROCK1**(-)NM_005406.2| **Exon:1**|chr18:18690779:chr18:18690892 | NSCLC, n=2 |
| **NRG1**(+)NM_001159995.2|  **Exon:5**|chr8:32585467:chr8:32585494 | **DPYSL2**(+)NM_001197293.2| **Exon:7**|chr8:26485388:chr8:26485456 |

**Table S1.** Descriptions of *NRG1* Fusions Identified. *Novel fusion. Abbreviations: NSCLC, non-small cell lung cancer; PDAC, pancreatic ductal adenocarcinoma; GBC, gallbladder cancer (cholangiocarcinoma); CRC, colorectal cancer. RCC, renal cell carcinoma; NET, neuroendocrine tumor.
